# Supplementary material for: Evolutionary genomics of KPC-2-producing Serratia marcescens and characterization of a novel bla KPC-2 -harboring plasmid
Source: Research Square preprint supplement (doi:10.21203/rs.3.rs-7668867/v1), 2025-10-09
Supplement: Supplementary file 1 [file 1331d020ae255a02b87c5d21.docx]

**Table 1 Antimicrobial drug susceptibility profiles**

| Antibiotics | MIC (mg/L)/antimicrobial susceptibility | | | | | | | | | | | | | |
| --- | --- | --- | --- | --- | --- | --- | --- | --- | --- | --- | --- | --- | --- | --- |
| K17 | K64 | K72 | K591 | K693 | K704 | K729 | K927 | K928 | K935 | K1002 | K1030 | K1110 | K1304 |
| Amoxicillin/Clavulanic Acid | ≥32/R | ≥32/R | ≥32/R | ≥32/R | ≥32/R | ≥32/R | ≥32/R | ≥32/R | ≥32/R | ≥32/R | ≥32/R | ≥32/R | ≥32/R | ≥32/R |
| Cefuroxime | ≥64/R | ≥64/R | ≥64/R | ≥64/R | ≥64/R | ≥64/R | ≥64/R | ≥64/R | ≥64/R | ≥64/R | ≥64/R | ≥64/R | ≥64/R | ≥64/R |
| Cefoxitin | ≥64/R | 32/R | ≥64/R | ≥64/R | 32/R | ≥64/R | 32/R | ≥64/R | ≥64/R | ≥64/R | ≥64/R | 16/R | ≥64/R | ≥64/R |
| Ceftriaxone | ≥64/R | ≥64/R | ≥64/R | ≥64/R | ≥64/R | ≥64/R | ≥64/R | ≥64/R | ≥64/R | ≥64/R | ≥64/R | 32/R | ≥64/R | ≥64/R |
| Aztreonam | ≥64/R | ≥64/R | ≥64/R | ≥64/R | ≥64/R | ≥64/R | ≥64/R | ≥64/R | ≥64/R | ≥64/R | ≥64/R | 32/R | ≥64/R | ≥64/R |
| Ertapenem | ≥8R | ≥8R | ≥8R | ≥8R | ≥8R | ≥8R | ≥8R | ≥8R | ≥8R | ≥8R | ≥8R | 2/R | ≥8R | ≥8R |
| Meropenem | ≥16/R | ≥16/R | ≥16/R | ≥16/R | 8/R | ≥16/R | ≥16/R | ≥16/R | ≥16/R | ≥16/R | 8/R | ≥16/R | ≥16/R | ≥16/R |
| Amikacin | 4/S | 4/S | ≤2/S | 16/R | 4/S | 4/S | 4/S | 4/S | 4/S | ≤2/S | 4/S | ≤2/S | ≤2/S | 8/I |
| Tobramycin | ≥16/R | 8/R | 8/R | ≥16/R | 8/R | 8/R | 8/R | 8/R | 8/R | 2/S | ≥16/R | ≤1/S | ≤1/S | ≥16/R |
| Ciprofloxacin | 2/R | 2/R | ≥4/R | 2/R | ≥4/R | ≥4/R | ≥4/R | ≥4/R | ≥4/R | ≥4/R | ≥4/R | 0.5/I | ≤0.25/S | ≥4/R |
| Levofloxacin | 4/R | 4/R | ≥8R | 2/R | ≥8R | ≥8R | ≥8R | ≥8R | ≥8R | ≥8R | ≥8R | 1/I | ≤0.12/S | ≥8R |
| Tigecycline | 1/S | ≤0.5/S | 2/S | 2/S | 1/S | 1/S | 1/S | 1/S | 2/S | 2/S | 1/S | 1/S | 2/S | 2/S |
| Doxycycline | 2/S | 1/S | ≥16/R | 4/S | 2/S | 2/S | 2/S | 2/S | 4/S | 4/S | 2/S | 2/S | 8/ I | ≥16/R |
| Minocycline | 8/ I | 2/S | ≥16/R | 8/ I | 2/S | 4/S | 4/S | 2/S | 4/S | 8/ I | 2/S | 4/S | 8/ I | ≥16/R |
| Trimethoprim/Sulfamethoxazole | ≤20/S | ≤20/S | ≤20/S | ≤20/S | ≤20/S | ≤20/S | ≤20/S | ≤20/S | ≤20/S | ≤20/S | ≤20/S | ≤20/S | ≤20/S | ≤20/S |

S=sensitive；I=intermediate；R=resistant.
